# Supplementary material for: Interventions Targeting the Prescribing and Monitoring of Vancomycin for Hospitalized Patients: A Systematic Review Protocol
Source: Springer Nature journal article supplement (doi:10.1007/s40121-017-0177-7), 2017-10-27
Supplement: MOESM2 [file 15171138]

## Search strategy for Ovid MEDLINE

- 1 Vancomycin/
- 2 (vancocin or vancomycin).tw,kw.
- 3 1 or 2
- 4 education, continuing/ or education, medical, continuing/ or education, nursing, continuing/ or education, pharmacy, continuing/ or education, professional, retraining/
- 5 Practice Guideline/ or Guideline/ or Guideline Adherence/
- 6 guideline\*.tw,kw.
- 7 (guideline\* adj3 (adherenc\* or evaluat\* or introduct\* or impact\* or effect\* or disseminat\* or implement\* or integrat\*)).tw,kw.
- 8 Electronic Mail/
- 9 ((writte\* or print\* or oral or online\* or educat\*) adj2 (information or material\*)).tw,kw.
- 10 (face to face or face-to-face or train\* or lectur\* or tutor\* or seminar\* or workshop\* or academic detail\*).tw,kw.
- 11 (opinion leader\* or facilitator\* or "linking agent\*" or champion or "changing agent\*").mp.
- 12 ((knowlege or research) adj2 (translant\* or transfer\* or disseminat\* or implement\* or broker\*)).tw,kw.
- 13 remind\*.tw,kw.
- 14 Feedback/
- 15 feedback.tw,kw.
- 16 chart review.tw,kw.
- 17 Program Evaluation/
- 18 Quality Improvement/
- 19 Clinical Protocols/
- 20 (protocol\* or algorithm\* or leaflet\* or pamphlet\*).tw,kw.
- 21 computers, handheld/ or minicomputers/
- 22 (mobile\* or "cell phone\*" or "smart phone\*" or smartphone\*).tw,kw.
- 23 ((app\$1 or application\*) adj3 (phone\* or mobile\* or cell\*)).tw,kw.
- 24 Drug Monitoring/
- 25 (prescri\* or monitor\* or dosag\* or dosing).ti.
- 26 or/4-25
- 27 3 and 26
- 28 limit 27 to english language
- 29 (note or letter or editorial or comment).pt.
- 30 28 not 29
